# Supplementary material for: Effect of high doses of vitamin D supplementation on dengue virus replication, Toll-like receptor expression, and cytokine profiles on dendritic cells
Source: Springer Nature journal article supplement (doi:10.1007/s11010-019-03658-w), 2019-11-22
Supplement: 11010_2019_3658_MOESM1_ESM.pdf [file 11010_2019_3658_MOESM1_ESM.pdf]

**Title:**

**The effect of high doses of vitamin D supplementation on dengue virus replication, Toll-like receptor expression, and cytokine profiles on dendritic cells**

**Journal: Molecular and Cellular Biochemistry**

**Authors:**

**Jahnnyer Martínez<sup>1</sup>, Juan C. Hernández<sup>1,2</sup> Silvio Urcuqui-Inchima<sup>1</sup>**

<sup>1</sup> Grupo Inmunovirología, Facultad de Medicina, Universidad de Antioquia UdeA, 050010 Medellín, Colombia.

<sup>2</sup> Infettare, Facultad de Medicina, Universidad Cooperativa de Colombia. 050012 Medellín, Colombia.

**Responsible author:**

Silvio Urcuqui Inchima, Grupo Inmunovirología, Facultad de Medicina, Universidad de Antioquia UdeA, Calle 70 No. 52-21, 050010 Medellín, Colombia.

Phone/fax: 57-4-2196483, E-mail: [silvio.urcuqui@udea.edu.co](mailto:silvio.urcuqui@udea.edu.co)

### Supplementary 1. Primers and annealing temperature

| mRNA           | Orientation | Primers 5' → 3'            | Annealing temperature (°C) |
|----------------|-------------|----------------------------|----------------------------|
| TLR2           | Forward     | GCTGCTCGGCGTTCTCTCAGG      | 65                         |
|                | Reverse     | TGTCCAGTGCTTCAACCCACAAC    |                            |
| TLR3           | Forward     | ATTGGGTCTGGGAACATTTCTCTTC  | 63                         |
|                | Reverse     | GTGAGATTTAAACATTCCTCTTCGC  |                            |
| TLR7           | Forward     | TCTACCTGGGCCAAAAC          | 63                         |
|                | Reverse     | GGCACATGCTGAAGAGAGTTA      |                            |
| TLR9           | Forward     | TTATGGACTTCCTGCTGGAGGTGC   | 63                         |
|                | Reverse     | CTGCGTTTTGTCTGAAGACCA      |                            |
| $\beta$ -Actin | Forward     | ATCTGGCACCACACCTTCTACAATGA | 60                         |
|                | Reverse     | CGTCATACTCCTGCTTGCTGATCCAC |                            |

## Supplementary 2

A

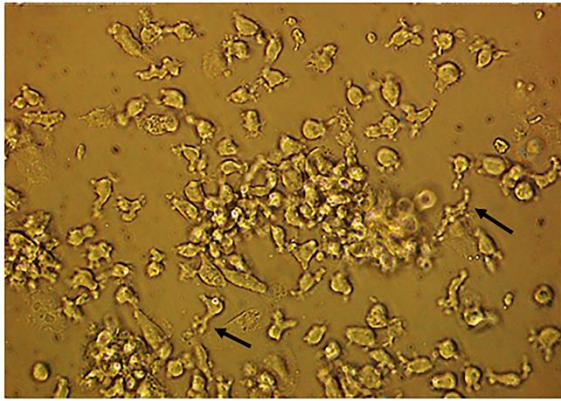

B

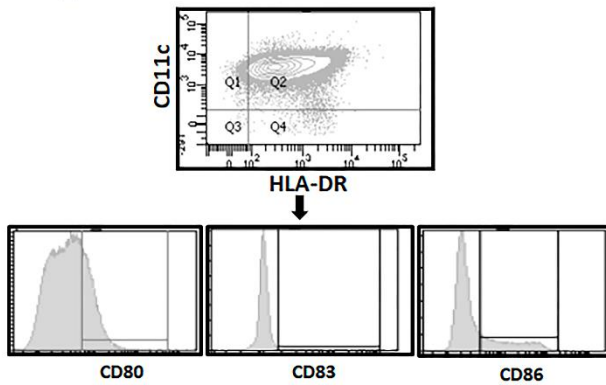

C

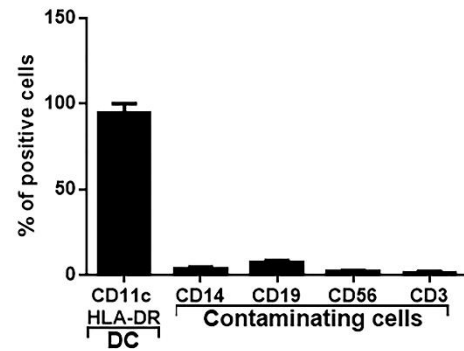

**Supplementary 2. Morphology, phenotype and purity of MDDCs.** CD14<sup>+</sup> cells were differentiated for 6 days in the presence of 750 U / ml GM-CSF and 500 U / ml IL-4. In (A) the morphology of the cells is shown; they have extensions or dendrites (see arrows) and aggregate formation. Cells were harvested and stained to determine their phenotype by flow cytometry; (B) represents a representative example of 5 independent experiments on the way the flow cytometric analysis was done after the acquisition of 50,000 events. (C) Shows the accumulated 4 independent experiments and the percentage of expression of the evaluated markers and the purity of the MDDCs

### Supplementary 3

**A**

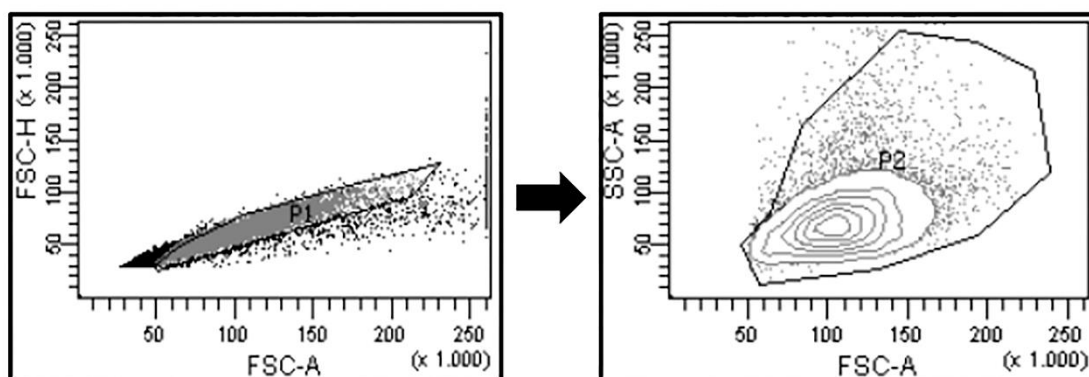

| TLR-2 PE-A |         |         |      |
|------------|---------|---------|------|
| Population | #Events | %Parent | Mean |
| P2         | 7.293   | 97,5    | 506  |

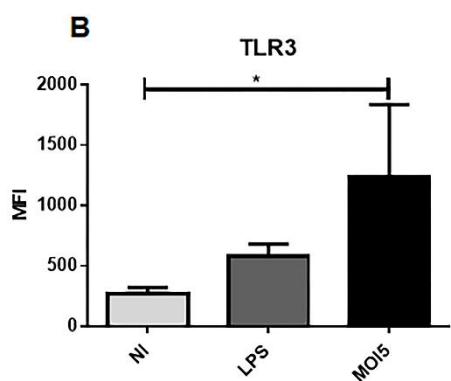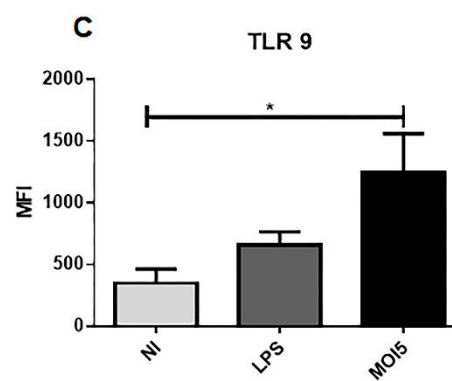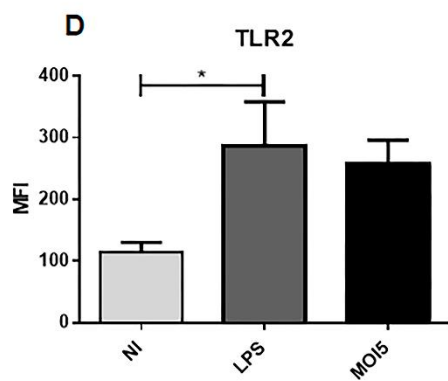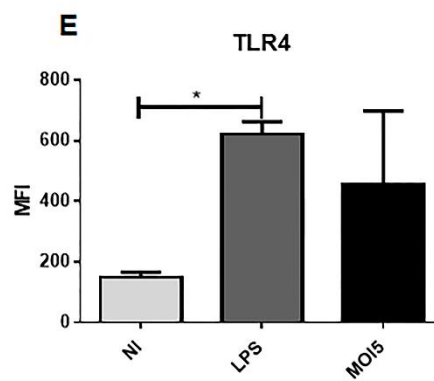

**Supplementary 3. DENV-2 infection of the MDDCs induces alteration in the expression of TLRs.** In (A) we show the gating strategy to determine the expression density by quantifying the mean fluorescence intensity (MFI) of TLRs in the population. The MDDCs were stimulated with LPS (10ng / ml) or infected with DENV-2 (MOI 5) for 48 hours. After the stimulation the MDDCs were collected and the MFI for (B) TLR3, (C) TLR9, (D) TLR2, (E) and TLR4 was determined by flow cytometry using as control the MFI emitted by uninfected MDDCs after 48 hours of incubation. To determine the statistical differences between the groups we used a Kruskal-Wallis test, the error bars show the median and interquartile range. \* p <0.05 \*\* , p <0.01, \*\*\* p <0.001; n = 3

## Supplementary 4

### A. Possible VDRE in the TLR3 gene sequence

| Model ID | Model name | Score  | Relative score    | Start | End   | Strand | predicted site sequence |
|----------|------------|--------|-------------------|-------|-------|--------|-------------------------|
| MA0074.1 | RXRA::VDR  | 10.826 | 0.804366715572581 | 1552  | 1566  | 1      | GGATCAAGAGGTAA          |
| MA0693.1 | Vdr        | 3.469  | 0.808082688078768 | 2802  | 2817  | 1      | AAGGTTGCAAAGTTTA        |
| MA0693.1 | Vdr        | 5.109  | 0.821798938757165 | 3122  | 3137  | -1     | AAATTCAGTAAGTTTA        |
| MA0693.1 | Vdr        | 3.070  | 0.804745624651523 | 9147  | 9162  | 1      | AAGTTTATGGAGGTAA        |
| MA0074.1 | RXRA::VDR  | 11.280 | 0.813526734251219 | 9597  | 9611  | -1     | AGATCATCGGGTACC         |
| MA0693.1 | Vdr        | 4.494  | 0.816655344752766 | 12009 | 12024 | 1      | GGGGGCATTGGTGCA         |
| MA0074.1 | RXRA::VDR  | 11.070 | 0.809289721206034 | 16367 | 16381 | -1     | GGTCAATGACTTTA          |
| MA0693.1 | Vdr        | 7.309  | 0.840198787228185 | 16367 | 16382 | -1     | AGGTTCAATGACTTTA        |
| MA0693.1 | Vdr        | 14.085 | 0.896870320518928 | 16629 | 16644 | -1     | GAGTTCAAAGGGGGCA        |
| MA0693.1 | Vdr        | 8.129  | 0.847056912567384 | 16742 | 16757 | 1      | CAGTACATCGAGTTCT        |

### B. Possible VDRE in the TLR7 gene sequence

| Model ID | Model name | Score  | Relative score    | Start | End   | Strand | predicted site sequence |
|----------|------------|--------|-------------------|-------|-------|--------|-------------------------|
| MA0693.1 | Vdr        | 5.577  | 0.825713088341    | 4226  | 4241  | 1      | GAGTTACTAGATTTG         |
| MA0693.1 | Vdr        | 5.055  | 0.821347306112876 | 11654 | 11669 | -1     | AGGTTCCAGAGTTGA         |
| MA0074.1 | RXRA::VDR  | 11.070 | 0.809289721206034 | 12030 | 12044 | -1     | GAGTTAATGGGTACA         |
| MA0693.1 | Vdr        | 2.609  | 0.800890020040096 | 15447 | 15462 | 1      | AGGTCGGCTTGGTGCA        |
| MA0693.1 | Vdr        | 6.992  | 0.837547536334861 | 17575 | 17590 | 1      | GGCTGCACCCAGTTCA        |
| MA0074.1 | RXRA::VDR  | 11.251 | 0.812941622925932 | 17857 | 17871 | -1     | GGGTCAGGGAATTCC         |
| MA0693.1 | Vdr        | 4.181  | 0.814037548129389 | 17929 | 17944 | -1     | CAGGACAGTGGGTGCA        |

### C. Possible VDRE in the TLR9 gene sequence

| Model ID | Model name | Score  | Relative score    | Start | End  | Strand | predicted site sequence |
|----------|------------|--------|-------------------|-------|------|--------|-------------------------|
| MA0074.1 | RXRA::VDR  | 11.421 | 0.816371585867272 | 1997  | 2011 | -1     | GGGGCACAGACTTCA         |
| MA0074.1 | RXRA::VDR  | 12.006 | 0.828174693636002 | 3047  | 3061 | -1     | GGTTGATGAAGTTCA         |
| MA0693.1 | Vdr        | 5.847  | 0.827971251562443 | 3047  | 3062 | -1     | TGGTTGATGAAGTTCA        |
| MA0693.1 | Vdr        | 2.529  | 0.80022093464115  | 4151  | 4166 | -1     | AAGTCCATAAAGGCCG        |

**Supplementary 4. Prediction of possible VDRE in the TLR3, 7 and 9 gene sequence.** With the help of the JASPAR database, VDRE prediction was performed on the promoter or coding sequence of the TLRs regulated by VitD supplementation, finding 10 possible binding sites for TLR3 (A), 7 for TLR7 (B) and 4 for TLR9 (C)
